# Supplementary material for: 概念的“静态”与“动态”特征及其表征结构-面向对象的研究方法
Source: MDPI journal article supplement (doi:10.3390/vaccines10050650), 2009-01-01
Supplement: s1 [file s1]

## Supplementary Text S2:

Estimation of working time preservation (in days) at UKER due to a theoretical COVID-19 vaccination from the beginning of the pandemic based on the number of SARS-CoV-2 infections detected by PCR amongst UKER employees

*Part 1. Loss of working time (in days) preventable by vaccination:*

$$a = c \times d \times b$$

a = working time theoretically preventable by COVID-19 vaccination; b = average time of SARS-CoV-2 positivity; c = number of UKER staff members tested positive for SARS-CoV-2 infection by PCR since the start of the pandemic until April 2021; d = vaccine efficacy.

Values: b = 23 days; c = 408 (April 2021); d = 95% [9].

$$a \text{ (total)} = 408 \times 0.95 \times 23 \text{ days} = \mathbf{8,915 \text{ days}}$$

*Part 2. Preventable loss of working time due to complete vaccination since the beginning of the pandemic, taking into account the inability to work due to vaccination:*

$$a' = c \times d \times b - e \times f$$

e = estimated average time of incapacity to work for each completely vaccinated staff member; f = number of UKER staff.

Values: e = 0.72 days (according to our data; see main text). f = 8,560 (November 2020).

$$a' \text{ (total)} = 408 \times 0.95 \times 23 \text{ days} - 0.72 \text{ days} \times 8,560 = 8,915 - 6,163 \text{ days} = \mathbf{2,752 \text{ days}}$$

*Part 3. The number of prevented infections (g) at which the preservation of working time due to vaccination outweighs the incapacity to work due to vaccination is calculated as:*

$$g = (e \times f) / (d \times b) = (0.72 \text{ days} \times 8,560) / (0.95 \times 23 \text{ days}) = \mathbf{282}$$
