# Supplementary material for: 概念的“静态”与“动态”特征及其表征结构-面向对象的研究方法
Source: MDPI journal article supplement (doi:10.3390/vaccines10050650), 2009-01-01
Supplement: s1 [file s1]

**Supplementary Table S2:**

Frequency of adverse effects after the first versus the second dose of BNT162b2 mRNA vaccine (given as percentage of all survey participants)

|                                 | After vaccine dose 1 | After vaccine dose 2 |
|---------------------------------|----------------------|----------------------|
| <b>Any adverse effects</b>      | 79,5%                | 84,7%                |
| <b>Inability to work</b>        | 7,9%                 | 34,7%                |
| <b>Local adverse effects</b>    | 73,0%                | 67,3%                |
| Pain at injection site          | 70,7%                | 64,9%                |
| Swelling                        | 13,5%                | 13,8%                |
| Redness                         | 6,1%                 | 6,3%                 |
| Itching at injection site       | 2,7%                 | 2,2%                 |
| Rash at injection site          | 0,1%                 | 0,2%                 |
| Urticaria at injection site     | 0,1%                 | 0,0%                 |
| Other at injection site         | 2,4%                 | 1,7%                 |
| <b>Systemic adverse effects</b> | 42,8%                | 72,0%                |
| Skin Rash                       | 0,4%                 | 0,9%                 |
| Generalized Itching             | 0,7%                 | 0,6%                 |
| Urticaria                       | 0,2%                 | 0,2%                 |
| Local lymphadenopathy           | 3,4%                 | 7,6%                 |
| Skin (Other)                    | 0,4%                 | 0,4%                 |
| Chills                          | 4,1%                 | 25,7%                |
| Malaise                         | 9,1%                 | 29,2%                |
| Nausea                          | 3,4%                 | 9,2%                 |
| Vomiting                        | 0,3%                 | 1,2%                 |
| Fatigue                         | 25,1%                | 53,9%                |
| Systemic (Other)                | 3,7%                 | 5,5%                 |
| Headache                        | 16,8%                | 38,0%                |
| Limb Pain                       | 6,4%                 | 30,4%                |
| Arthralgia                      | 3,2%                 | 13,2%                |
| Myalgia                         | 10,6%                | 19,1%                |
| Pain (Other)                    | 1,3%                 | 2,7%                 |
| Feverish                        | 2,1%                 | 19,7%                |
| Anaphylaxis                     | 0,0%                 | 0,0%                 |
| Anaphylactoid reactions         | 0,2%                 | 0,3%                 |
| Facial paralysis                | 0,1%                 | 0,1%                 |
| Nervous System (Other)          | 0,4%                 | 0,9%                 |
| <b>Other adverse effects</b>    | 2,3%                 | 5,1%                 |
