# Supplementary material for: 概念的“静态”与“动态”特征及其表征结构-面向对象的研究方法
Source: MDPI journal article supplement (doi:10.3390/vaccines10050650), 2009-01-01
Supplement: s1 [file s1]

## **Supplementary Text S1:**

### **Survey "Side effects after COVID-19 vaccination" at University Hospital Erlangen**

Thank you for participating in this survey! Mandatory fields are marked by a red star\*.

#### **Part 1: General data**

Age (years):\*

Weight (kg):\*

Height (cm):\*

Sex (d/m/w):\* d ☐ m ☐ w ☐

Pre-existing conditions:\* no ☐ yes ☐: Which pre-existing conditions?.....

Allergies:\* no ☐ yes ☐: Which allergies?.....

Occupational group:\* Nursing staff with direct patient contact ☐ medical staff with direct patient contact ☐  
administrative staff with direct patient contact ☐ other staff with direct patient contact ☐ administrative staff  
without direct patient contact ☐ laboratory staff ☐ research staff (physicians, scientists, technical assistants  
etc.) ☐ hospital pharmacy staff ☐ technical service (incl. IT staff) ☐ cleaning staff ☐ kitchen staff.

#### **Part 2: First dose of vaccine**

##### **General data**

Vaccine applied:\* Comirnaty®/BioNtech ☐ COVID-19 Vaccine Moderna® ☐ COVID-19 Vaccine AstraZeneca ☐

Batch number:\*

Date of vaccination:\*

Did you take any precautionary painkillers and/or antipyretics *before* vaccination?\* no ☐ yes ☐

If yes, which medication did you take, for how long, and at what dose?

- Medication:
- Duration in days:
- Dose:

Did you take painkillers and/or antipyretics *after* vaccination to treat any adverse effects?\* no ☐ yes ☐

If yes, what medication did you take, for how long, and at what dose?

- Medication:
- Duration in days:
- Dose:

Were you unable to work after vaccination due to adverse effects? If you had time off, would you have been unable to work? \* no ☐ yes ☐

If yes, how long were you unable to work after vaccination? (whole days):

## Adverse effects

Did you experience any adverse effects: \* no ☐ yes ☐

Please provide the following information for any adverse effects that occurred:

(a) onset/end of adverse effect

b) Subjective severity of adverse effect (1-10, 1 = very mild 10 = very severe).

c) Restoration of health

| Side effects                                       | Onset | End | Severity | Restoration of health |
|----------------------------------------------------|-------|-----|----------|-----------------------|
| <b>Reactions at injection site</b>                 |       |     |          |                       |
| Pain <input type="checkbox"/> :                    |       |     |          |                       |
| Swelling <input type="checkbox"/> :                |       |     |          |                       |
| Redness <input type="checkbox"/> :                 |       |     |          |                       |
| Itching <input type="checkbox"/> :                 |       |     |          |                       |
| Rash <input type="checkbox"/> :                    |       |     |          |                       |
| Urticaria <input type="checkbox"/> :               |       |     |          |                       |
| Others <input type="checkbox"/> : Which?           |       |     |          |                       |
| <b>Skin reactions</b>                              |       |     |          |                       |
| Rash <input type="checkbox"/> :                    |       |     |          |                       |
| Itching <input type="checkbox"/> :                 |       |     |          |                       |
| Urticaria <input type="checkbox"/> :               |       |     |          |                       |
| Swelling of lymph nodes <input type="checkbox"/> : |       |     |          |                       |
| Others <input type="checkbox"/> : Which?           |       |     |          |                       |
| <b>Reduction of general condition</b>              |       |     |          |                       |
| Chills <input type="checkbox"/> :                  |       |     |          |                       |
| Malaise <input type="checkbox"/> :                 |       |     |          |                       |
| Nausea <input type="checkbox"/> :                  |       |     |          |                       |
| Vomiting <input type="checkbox"/> :                |       |     |          |                       |
| Weakness, fatigue <input type="checkbox"/> :       |       |     |          |                       |
| Others <input type="checkbox"/> : Which?           |       |     |          |                       |
| <b>Pain</b>                                        |       |     |          |                       |
| Headache <input type="checkbox"/> :                |       |     |          |                       |
| Limb pain <input type="checkbox"/> :               |       |     |          |                       |
| Arthralgia <input type="checkbox"/> :              |       |     |          |                       |
| Myalgia <input type="checkbox"/> :                 |       |     |          |                       |
| Others <input type="checkbox"/> : Which?           |       |     |          |                       |
| <b>Fever</b>                                       |       |     |          |                       |
| Height of temperature <input type="checkbox"/> :   |       |     |          |                       |
| <b>Allergic reaction</b>                           |       |     |          |                       |
| Anaphylaxis <input type="checkbox"/> :             |       |     |          |                       |
| Others <input type="checkbox"/> : Which?           |       |     |          |                       |
| <b>Damage to the nervous system</b>                |       |     |          |                       |
| Facial paralysis <input type="checkbox"/> :        |       |     |          |                       |
| Others <input type="checkbox"/> : Which?           |       |     |          |                       |
| <b>Other adverse effects</b>                       |       |     |          |                       |
| Others <input type="checkbox"/> : Which?           |       |     |          |                       |

### **Part 3: Second dose of vaccine**

#### **General data**

Vaccine applied:\* Comirnaty®/BioNtech ☐ COVID-19 Vaccine Moderna® ☐ COVID-19 Vaccine AstraZeneca ☐

Batch number:\*

Date of vaccination:\*

Did you take any precautionary painkillers and/or antipyretics *before* vaccination? \* no ☐ yes ☐

If yes, which medication did you take, for how long, and at what dose?

- Medication:
- Duration in days:
- Dose:

Did you take painkillers and/or antipyretics *after* vaccination to treat any adverse effects?\* no ☐ yes ☐

If yes, what medication did you take, for how long, and at what dose?

- Medication:
- Duration in days:
- Dose:

Were you unable to work due to vaccination side effects? If you had time off, would you have been unable to work? \* no ☐ yes ☐

If yes, how long were you unable to work after vaccination? (whole days):

#### **Adverse effects**

Did you experience any adverse effect?\* no ☐ yes ☐

Please provide the following information for any adverse effects that occurred:

(a) onset/end of adverse effects

b) Subjective severity of adverse effect (1-10, 1 = very mild 10 = very severe).

c) Restoration of health

| Side effects                                       | Onset | End | Severity | Restoration of health |
|----------------------------------------------------|-------|-----|----------|-----------------------|
| <b>Reactions at injection site</b>                 |       |     |          |                       |
| Pain <input type="checkbox"/> :                    |       |     |          |                       |
| Swelling <input type="checkbox"/> :                |       |     |          |                       |
| Redness <input type="checkbox"/> :                 |       |     |          |                       |
| Itching <input type="checkbox"/> :                 |       |     |          |                       |
| Rash <input type="checkbox"/> :                    |       |     |          |                       |
| Urticaria <input type="checkbox"/> :               |       |     |          |                       |
| Others <input type="checkbox"/> : Which?           |       |     |          |                       |
| <b>Skin reactions</b>                              |       |     |          |                       |
| Rash <input type="checkbox"/> :                    |       |     |          |                       |
| Itching <input type="checkbox"/> :                 |       |     |          |                       |
| Urticaria <input type="checkbox"/> :               |       |     |          |                       |
| Swelling of lymph nodes <input type="checkbox"/> : |       |     |          |                       |

|                                                  |  |  |  |  |
|--------------------------------------------------|--|--|--|--|
| Others <input type="checkbox"/> : Which?         |  |  |  |  |
| <b>Reduction of general condition</b>            |  |  |  |  |
| Chills <input type="checkbox"/> :                |  |  |  |  |
| Malaise <input type="checkbox"/> :               |  |  |  |  |
| Nausea <input type="checkbox"/> :                |  |  |  |  |
| Vomiting <input type="checkbox"/> :              |  |  |  |  |
| Weakness, fatigue <input type="checkbox"/> :     |  |  |  |  |
| Others <input type="checkbox"/> : Which?         |  |  |  |  |
| <b>Pain</b>                                      |  |  |  |  |
| Headache <input type="checkbox"/> :              |  |  |  |  |
| Limb pain <input type="checkbox"/> :             |  |  |  |  |
| Arthralgia <input type="checkbox"/> :            |  |  |  |  |
| Myalgia <input type="checkbox"/> :               |  |  |  |  |
| Others <input type="checkbox"/> : Which?         |  |  |  |  |
| <b>Fever</b>                                     |  |  |  |  |
| Height of temperature <input type="checkbox"/> : |  |  |  |  |
| <b>Allergic reaction</b>                         |  |  |  |  |
| Anaphylaxis <input type="checkbox"/> :           |  |  |  |  |
| Others <input type="checkbox"/> : Which?         |  |  |  |  |
| <b>Damage to the nervous system</b>              |  |  |  |  |
| Facial paralysis <input type="checkbox"/> :      |  |  |  |  |
| Others <input type="checkbox"/> : Which?         |  |  |  |  |
| <b>Other side effects</b>                        |  |  |  |  |
| Others <input type="checkbox"/> : Which?         |  |  |  |  |

#### **Part 4: Further information**

Have you been diagnosed with SARS-CoV-2 infection after the 2nd dose of vaccination:\* no ☐ yes ☐.

Positive PCR test result:

Negative PCR test result:

Was the infection accompanied by symptoms? no ☐ yes ☐

| Symptoms               | Onset | End | Severity | Restoration of health |
|------------------------|-------|-----|----------|-----------------------|
| What kind of symptoms? |       |     |          |                       |

If you would like to share additional personal experience with your COVID-19 vaccination that goes beyond this questionnaire or if you develop a SARS-CoV-2 infection in the future, please feel free to contact us at the Institute of Clinical Microbiology, Immunology and Hygiene, either by e-mail or phone (Jan Esse, jan.esse@uk-erlangen.de, Tel. 46918; OA Dr. Bernd Kunz, bernd.kunz@uk-erlangen.de, Tel. 46902; Prof. Dr. Christian Bogdan, christian.bogdan@uk-erlangen.de, Tel. 22551).

#### **Part 5: Optional contact details**

Your information will be stored anonymously. The information cannot be traced back to you.

If you agree to be contacted about information you have provided, please enter your contact details below.  
You cannot be contacted without this information.

First Name (optional):

Second Name (optional):

Phone Number (optional):

Email Address (optional):
