# Supplementary material for: Homologous COVID-19 BNT162b2 mRNA Vaccination at a German Tertiary Care University Hospital: A Survey-Based Analysis of Reactogenicity, Safety, and Inability to Work among Healthcare Workers
Source: Vaccines (Basel). 2022 Apr 20;10(5):650. doi: 10.3390/vaccines10050650 (PMC9147477; doi:10.3390/vaccines10050650)
Supplement: Supplementary file 1 [file vaccines-10-00650-s001.zip]

Archive with 4 entries (4 files):
- Supplementary Table S1-JE-CB-20-4-2022.pdf
- Supplementary Table S2-JE-CB-20-4-2022.pdf
- Supplementary Text S1-JE-CB-20-4-2022.pdf
- Supplementary Text S2-JE-CB-20-4-2022.pdf
